# Supplementary material
Source: publisher figshare collection journal article supplement (https://karger.figshare.com/ndownloader/files/13866983)
Supplement: Supplementary file 1 [file 13866983]

## SUPPLEMENTARY MATERIAL

# **The Association of Echocardiographic Peak Systolic Strain Rate with Cardiovascular Outcomes in Haemodialysis Patients**

John Hughes   Darren Green   Diana YY Chiu   Nik Abidin   Philip A Kalra

Department of Renal Medicine, Salford Royal NHS Foundation Trust, Salford, UK

Supplementary Fig. 1. Bland Altman analysis of inter-user and intra-user variability.

**A. Graphical representation of inter-user variability of GLS (n=176).**

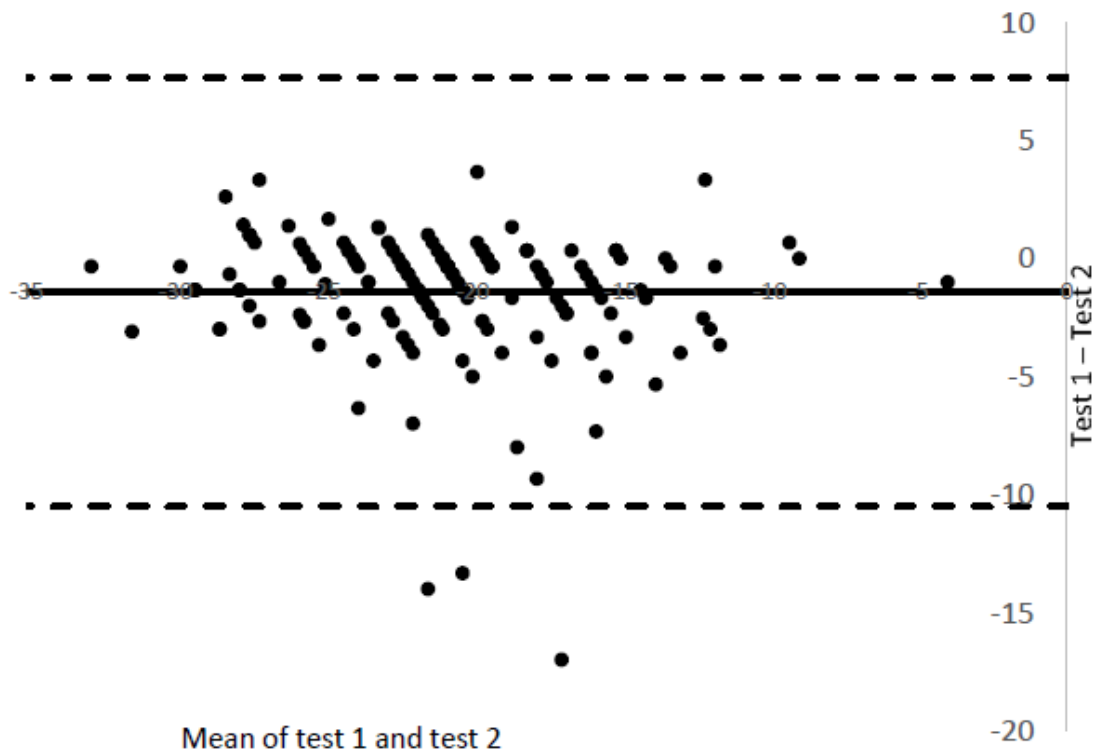

**B. Graphical representation of intra-user variability of global longitudinal strain**

**(n=44).**

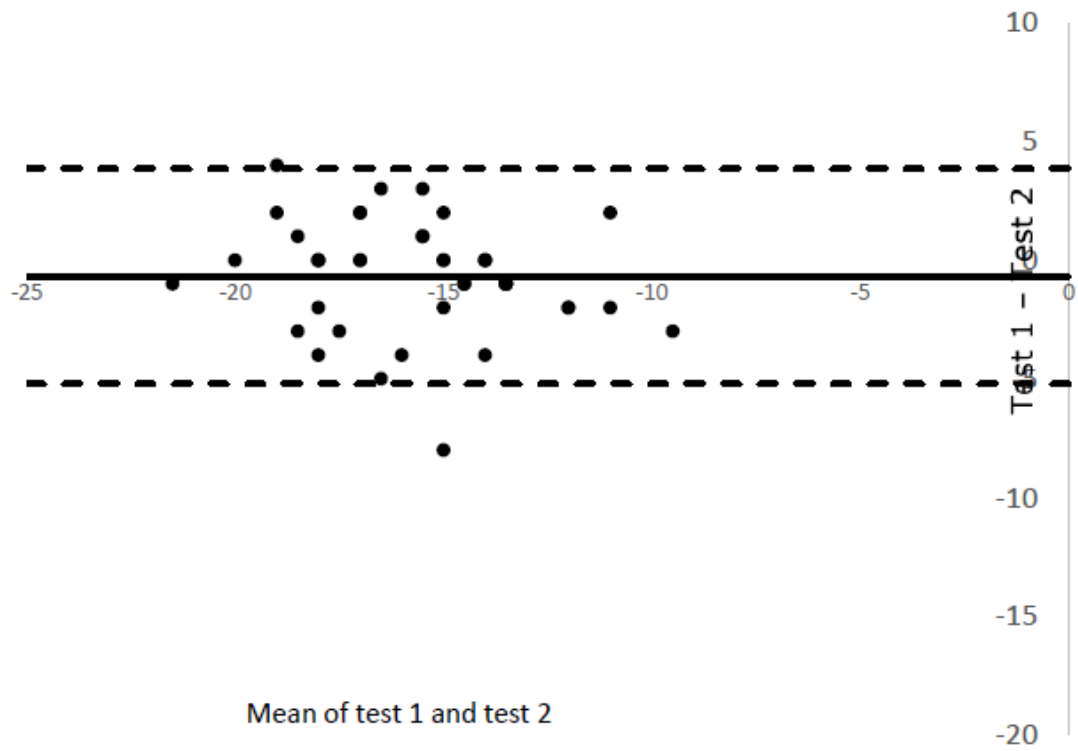

Supplementary Fig. 2. Study Consort Chart.

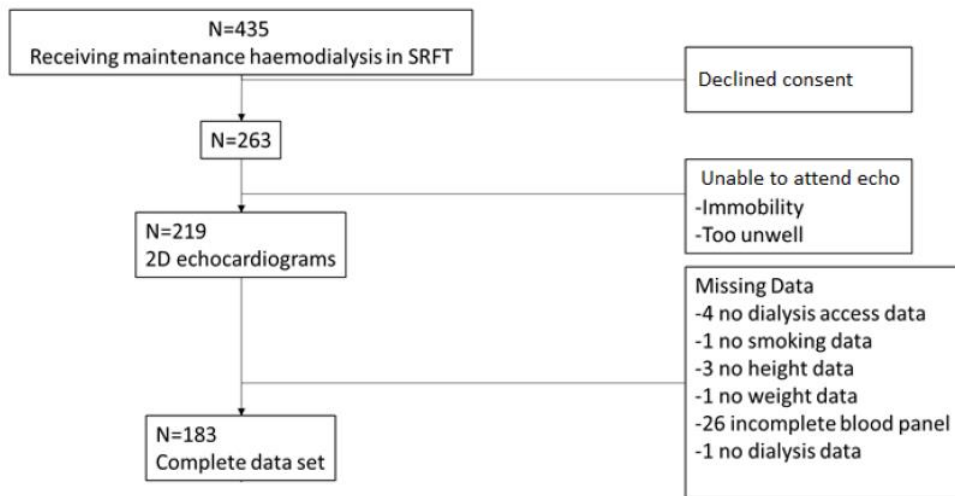

Supplementary Table 1. Multivariable cox regression model for mortality, cardiovascular mortality, MACE and heart failure.

|                        | RIP  |           |      | CV Death |            |       | MACE |           |       |
|------------------------|------|-----------|------|----------|------------|-------|------|-----------|-------|
|                        | HR   | 95% CI    | P    | HR       | 95% CI     | p     | HR   | 95% CI    | p     |
| EF (%)                 | 1.66 | 0.94-2.95 | 0.08 | 2.04     | 0.78-5.39  | 0.15  | 1.70 | 0.89-3.25 | 0.11  |
| E/e Ratio              |      |           |      |          |            |       | 2.09 | 1.03-4.24 | 0.04  |
| GLS (%)                |      |           |      |          |            |       |      |           |       |
| SRs (S <sup>-1</sup> ) | 2.10 | 1.18-3.73 | 0.01 | 2.80     | 1.13- 6.92 | 0.026 |      |           |       |
| Age (years)            | 1.82 | 0.91-3.65 | 0.09 |          |            |       |      |           |       |
| Smoker (%)             |      |           |      |          |            |       | 1.85 | 0.89-3.82 | 0.09  |
| MI (%)                 | 0.94 | 0.47-1.85 | 0.85 |          |            |       | 0.79 | 0.34-1.83 | 0.59  |
| Renal Tx (%)           | 0.24 | 0.03-1.77 | 0.16 |          |            |       |      |           |       |
| Statin (%)             |      |           |      |          |            |       | 2.83 | 1.24-6.49 | 0.014 |
| ACEi (%)               |      |           |      |          |            |       |      |           |       |
| Albumin (g/dL)         | 0.55 | 0.30-1.01 | 0.05 | 0.39     | 0.15- 1.03 | 0.057 |      |           |       |
| K(mmol/L)              |      |           |      | 3.01     | 1.20-7.56  | 0.02  |      |           |       |
| Systolic BP (mmHg)     | 1.46 | 0.80-2.68 | 0.22 |          |            |       | 1.00 | 0.99-1.02 | 0.36  |
| Diastolic BP (mmHg)    | 0.68 | 0.34-1.36 | 0.28 |          |            |       |      |           |       |
